# Supplementary material
Source: PubMed Central journal article supplement (PMC5102250)

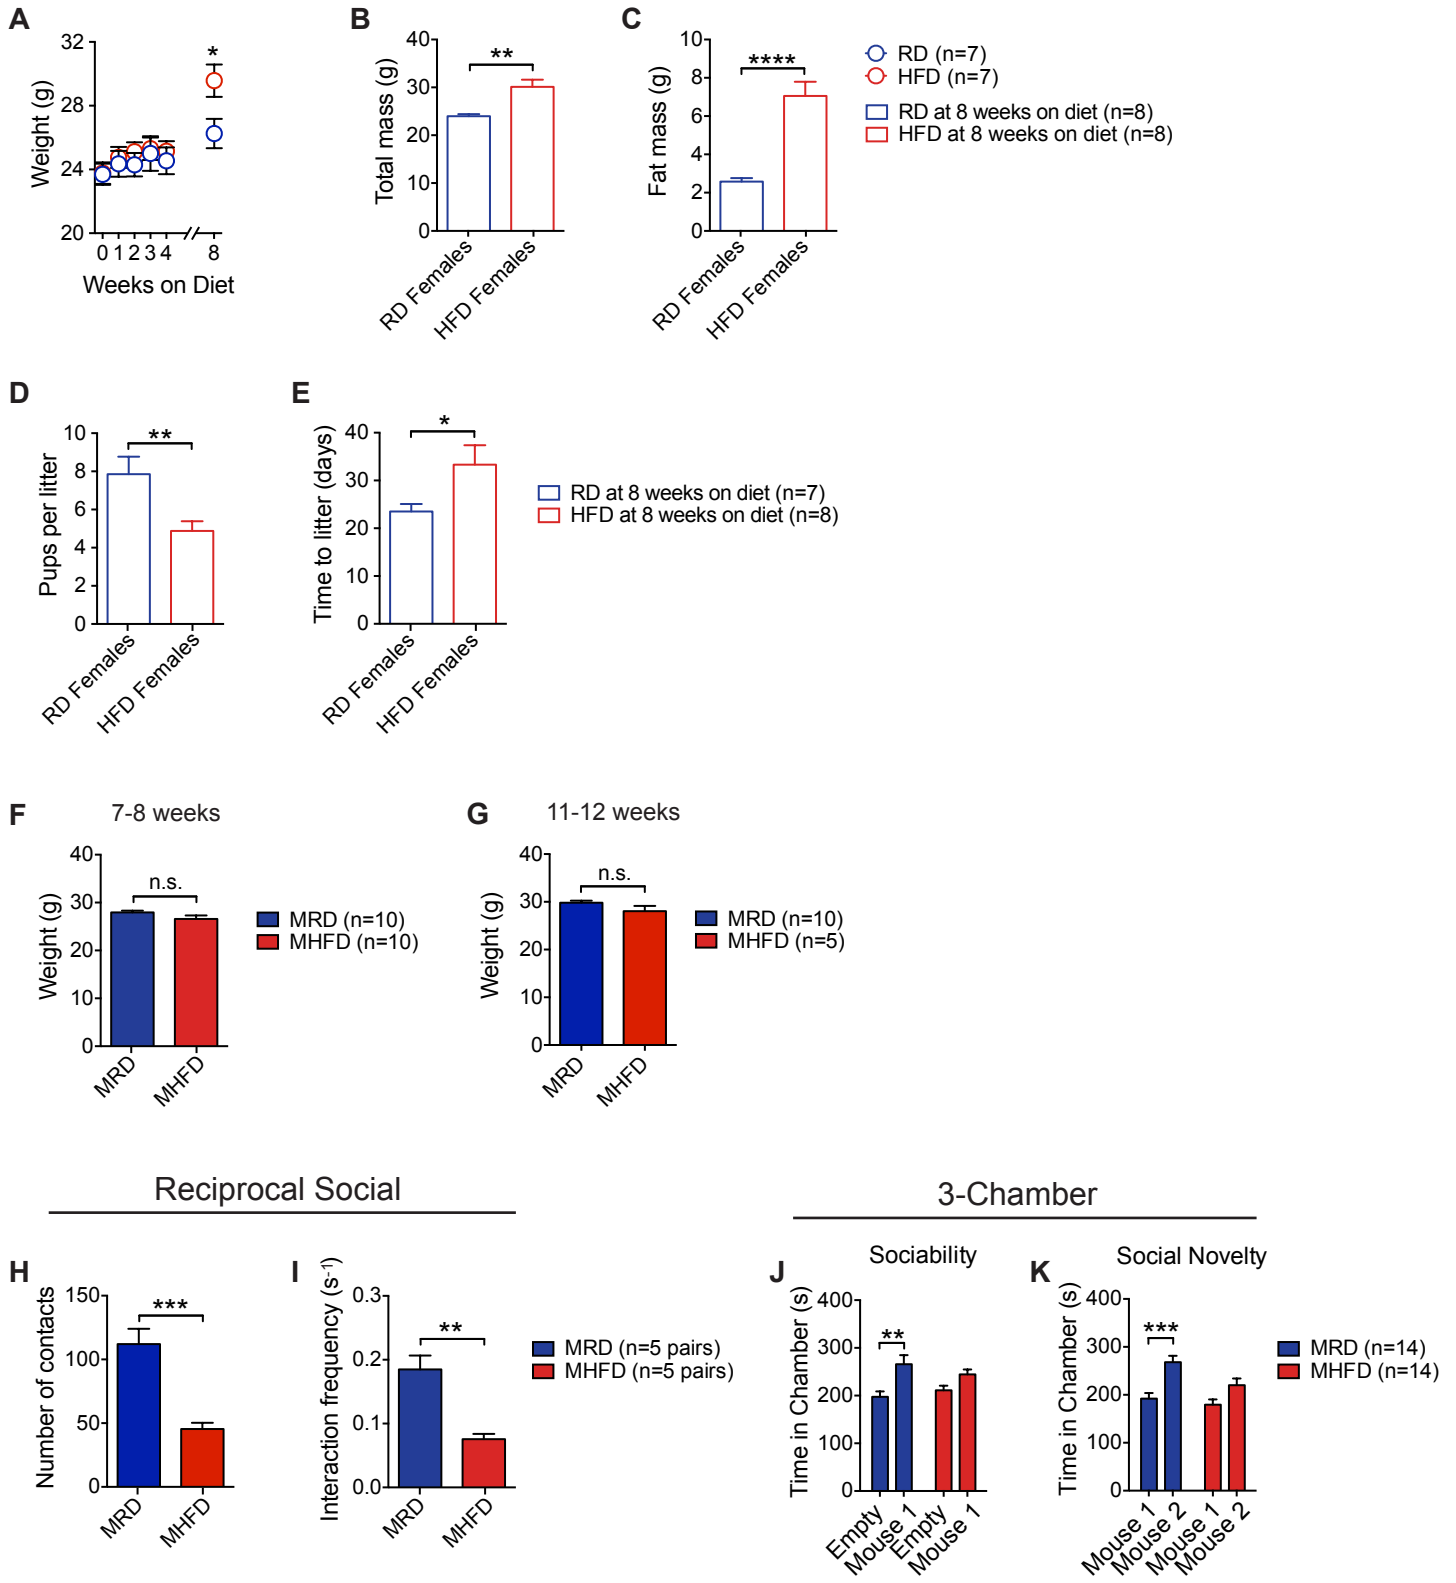

Figure S1, Buffington et al.

Supplement: NIHMS794301-supplement-1.pdf [file NIHMS794301-supplement-1.pdf]

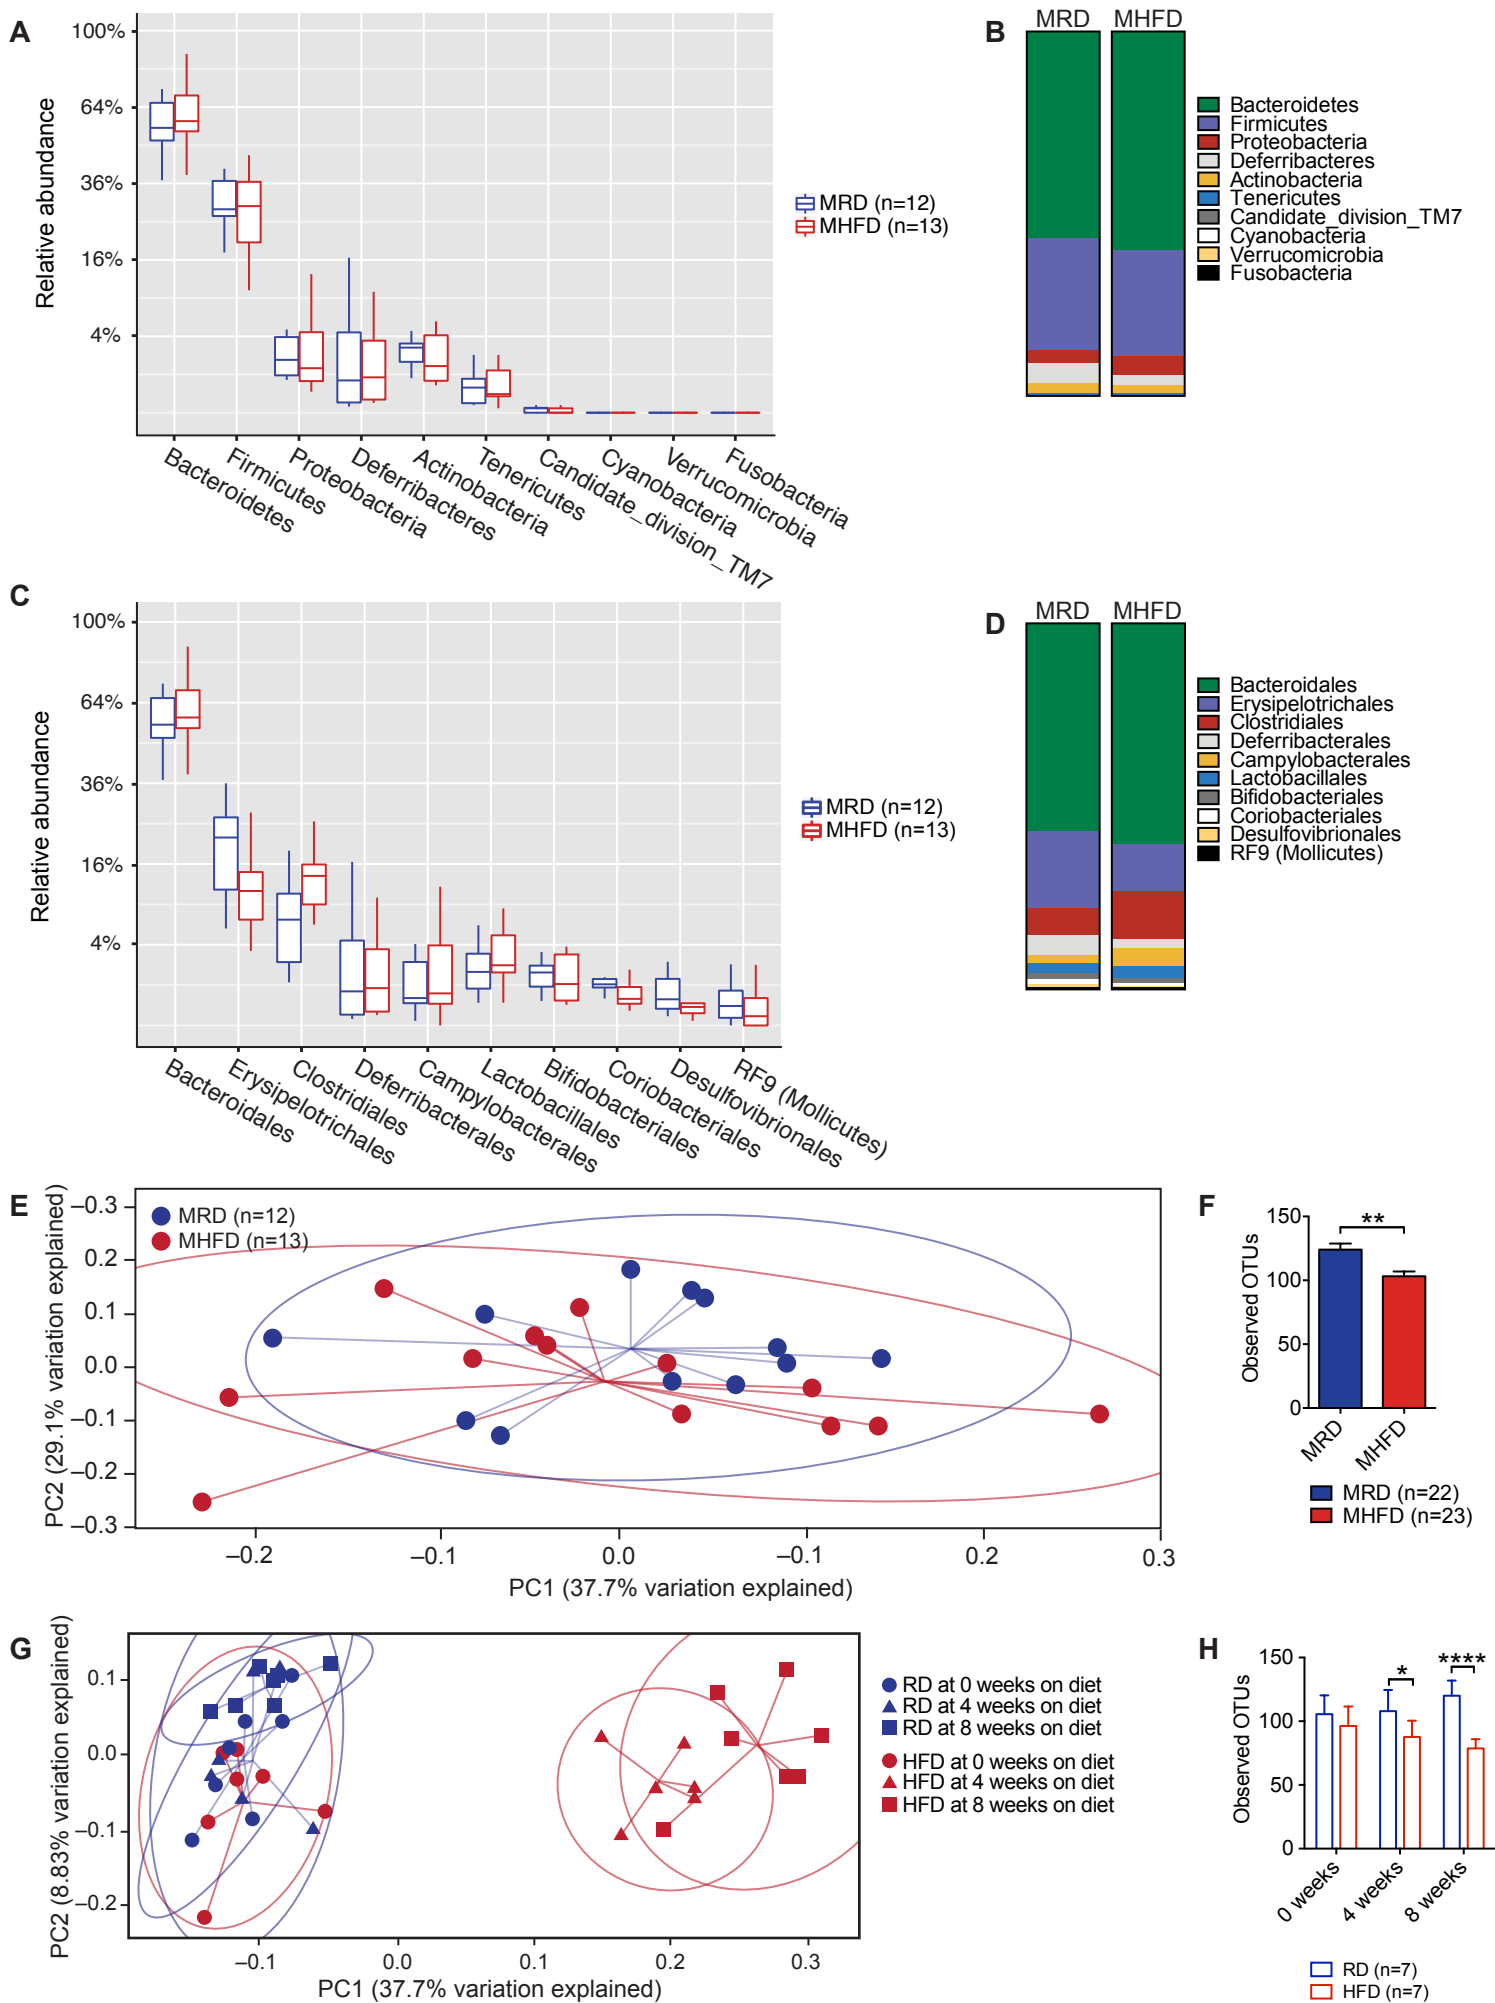

**Figure S2**, Buffington et al.

Supplement: NIHMS794301-supplement-2_revised.pdf [file NIHMS794301-supplement-2_revised.pdf]

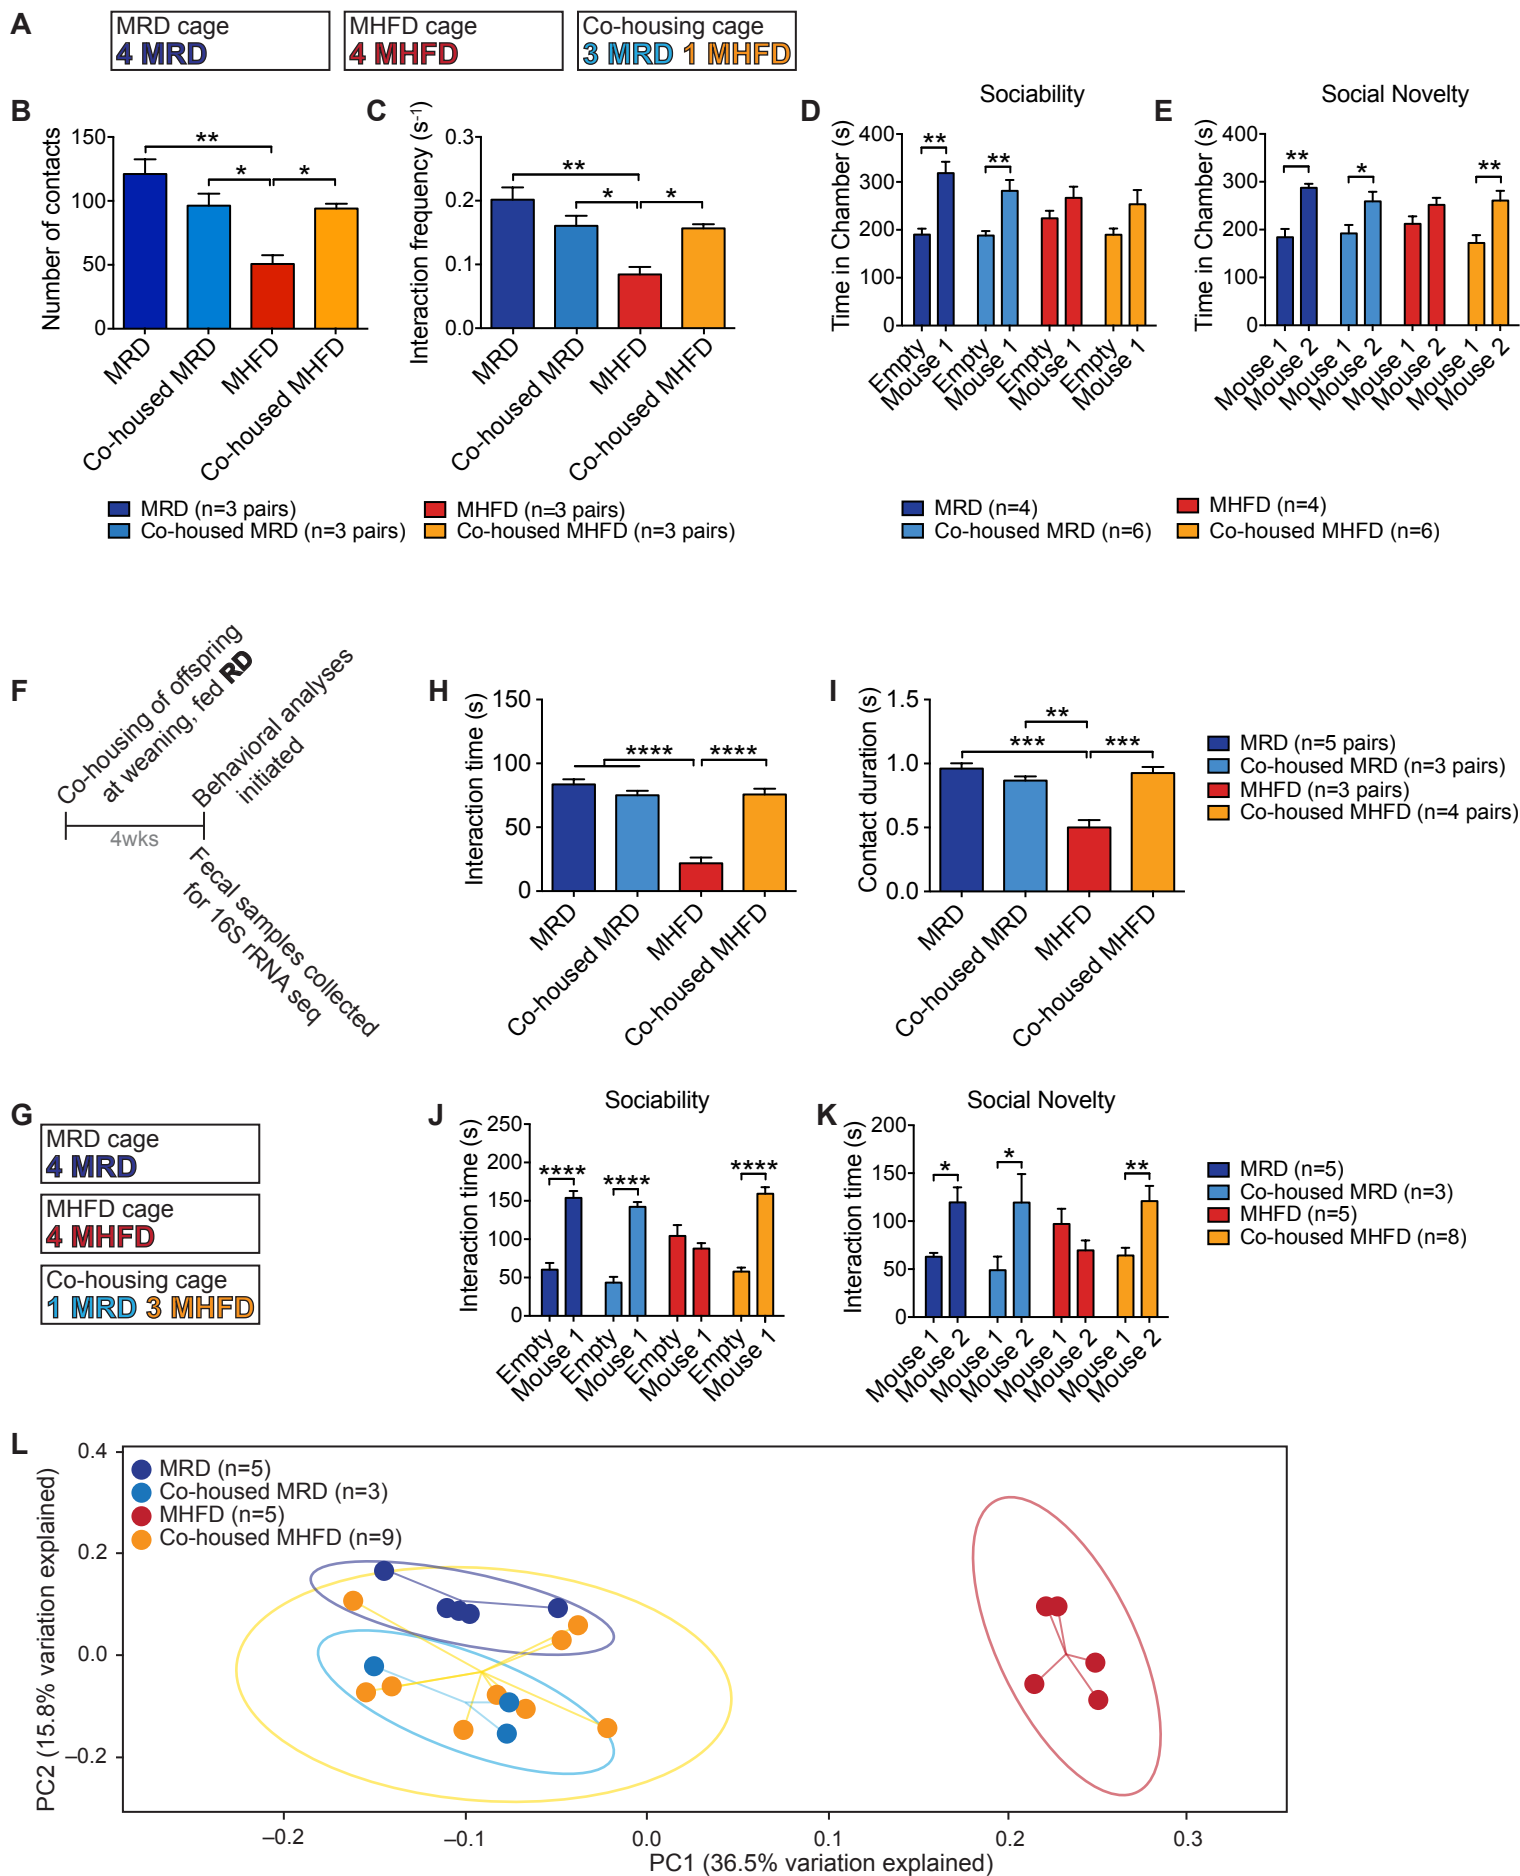

Figure S3, Buffington et al.

Supplement: NIHMS794301-supplement-3.pdf [file NIHMS794301-supplement-3.pdf]

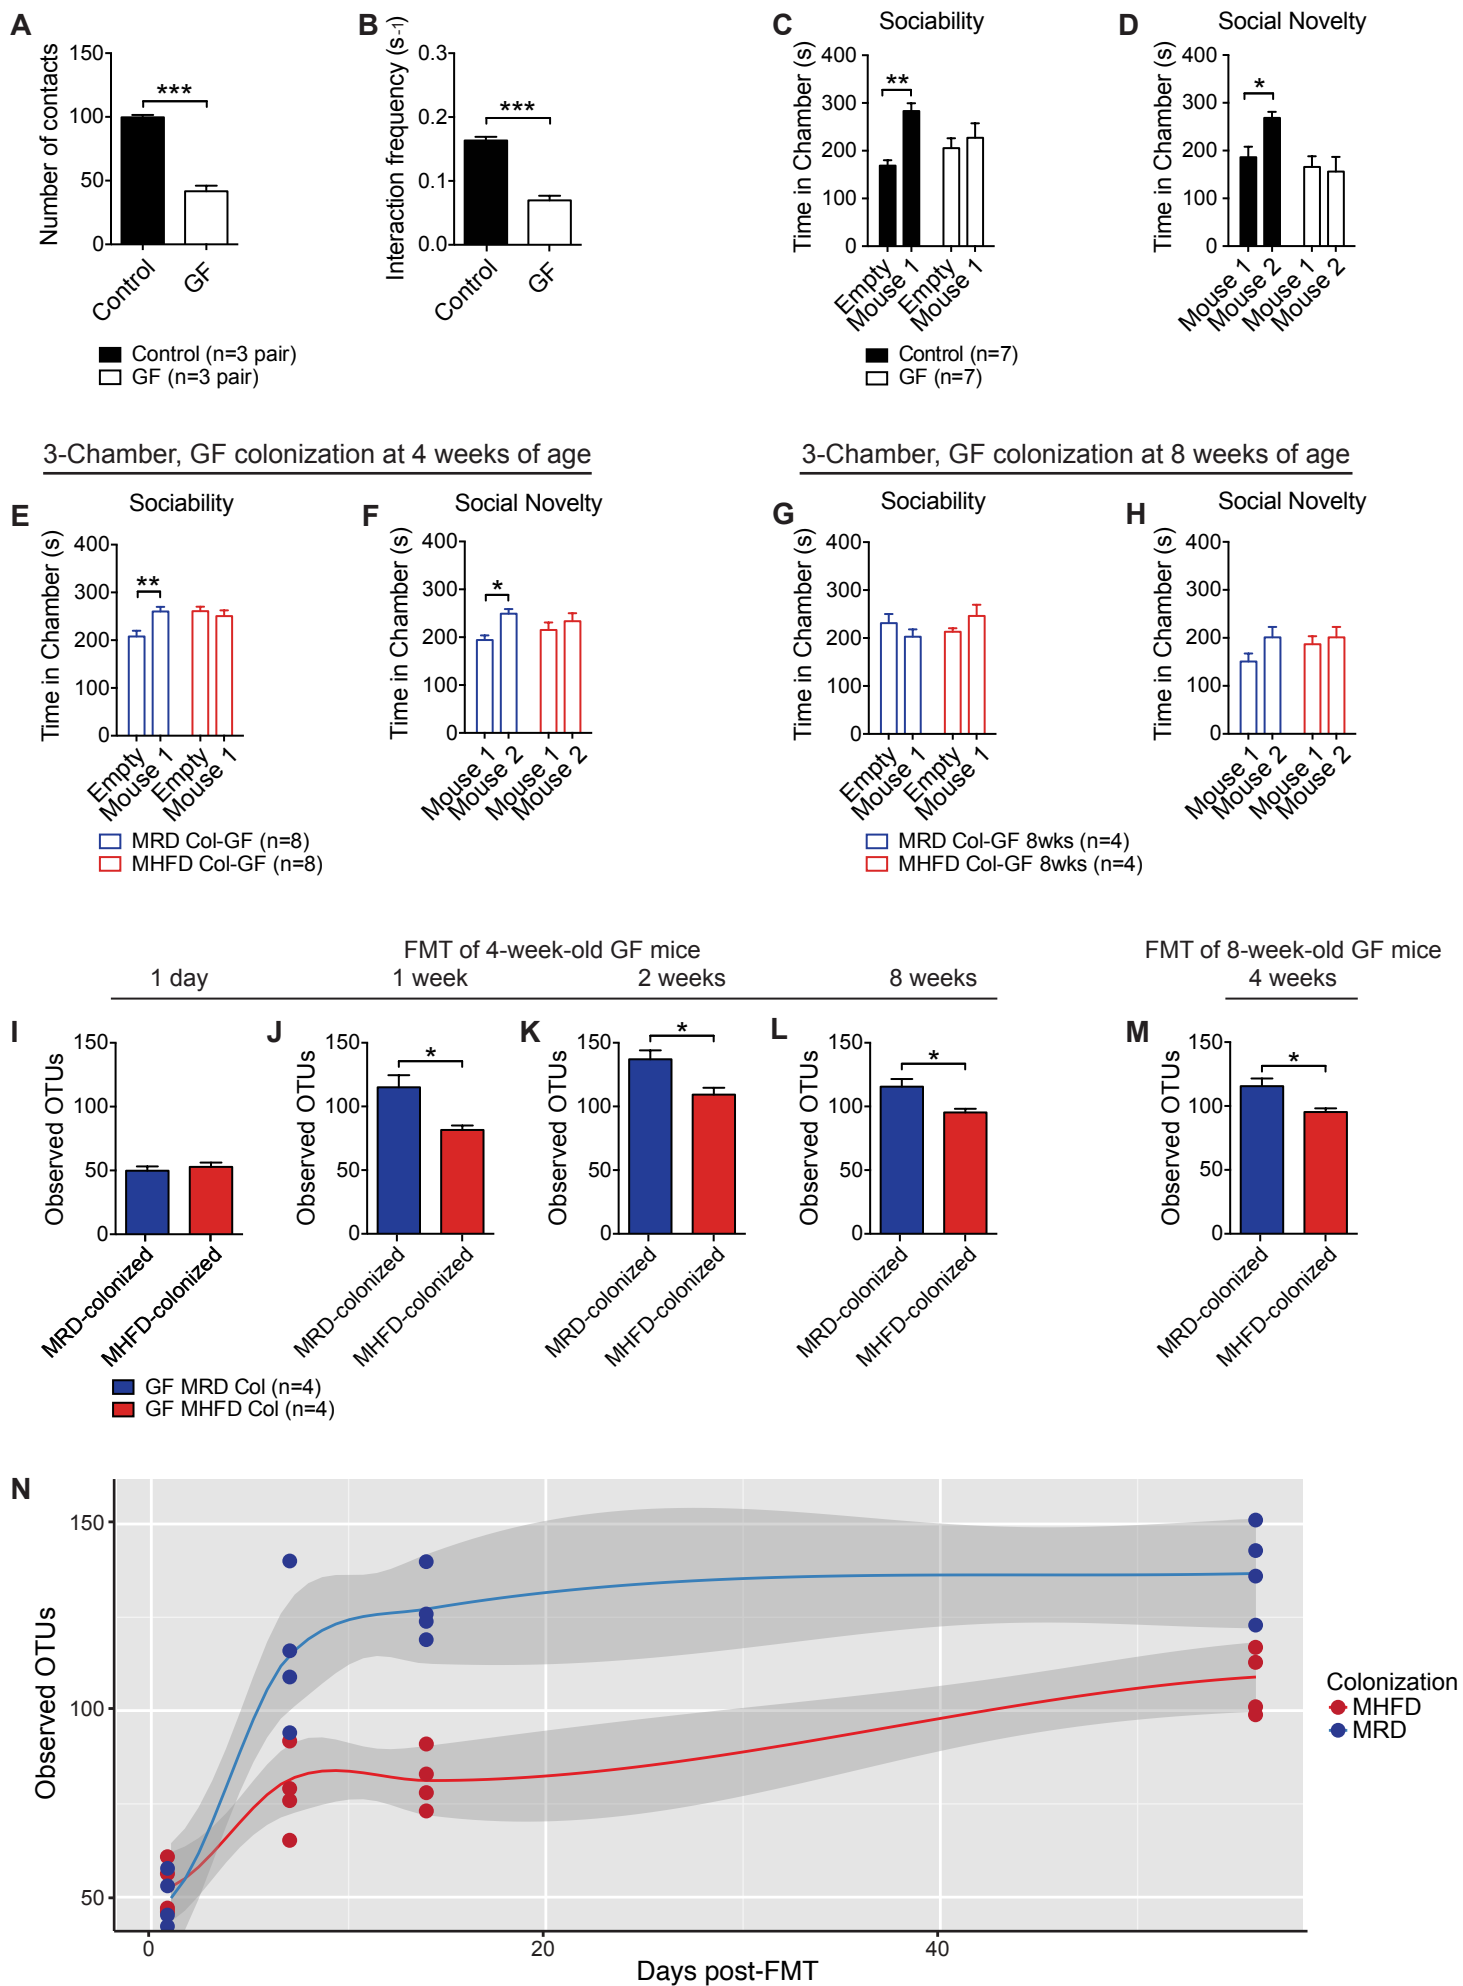

Figure S4, Buffington et al.

Supplement: NIHMS794301-supplement-4_revised.pdf [file NIHMS794301-supplement-4_revised.pdf]

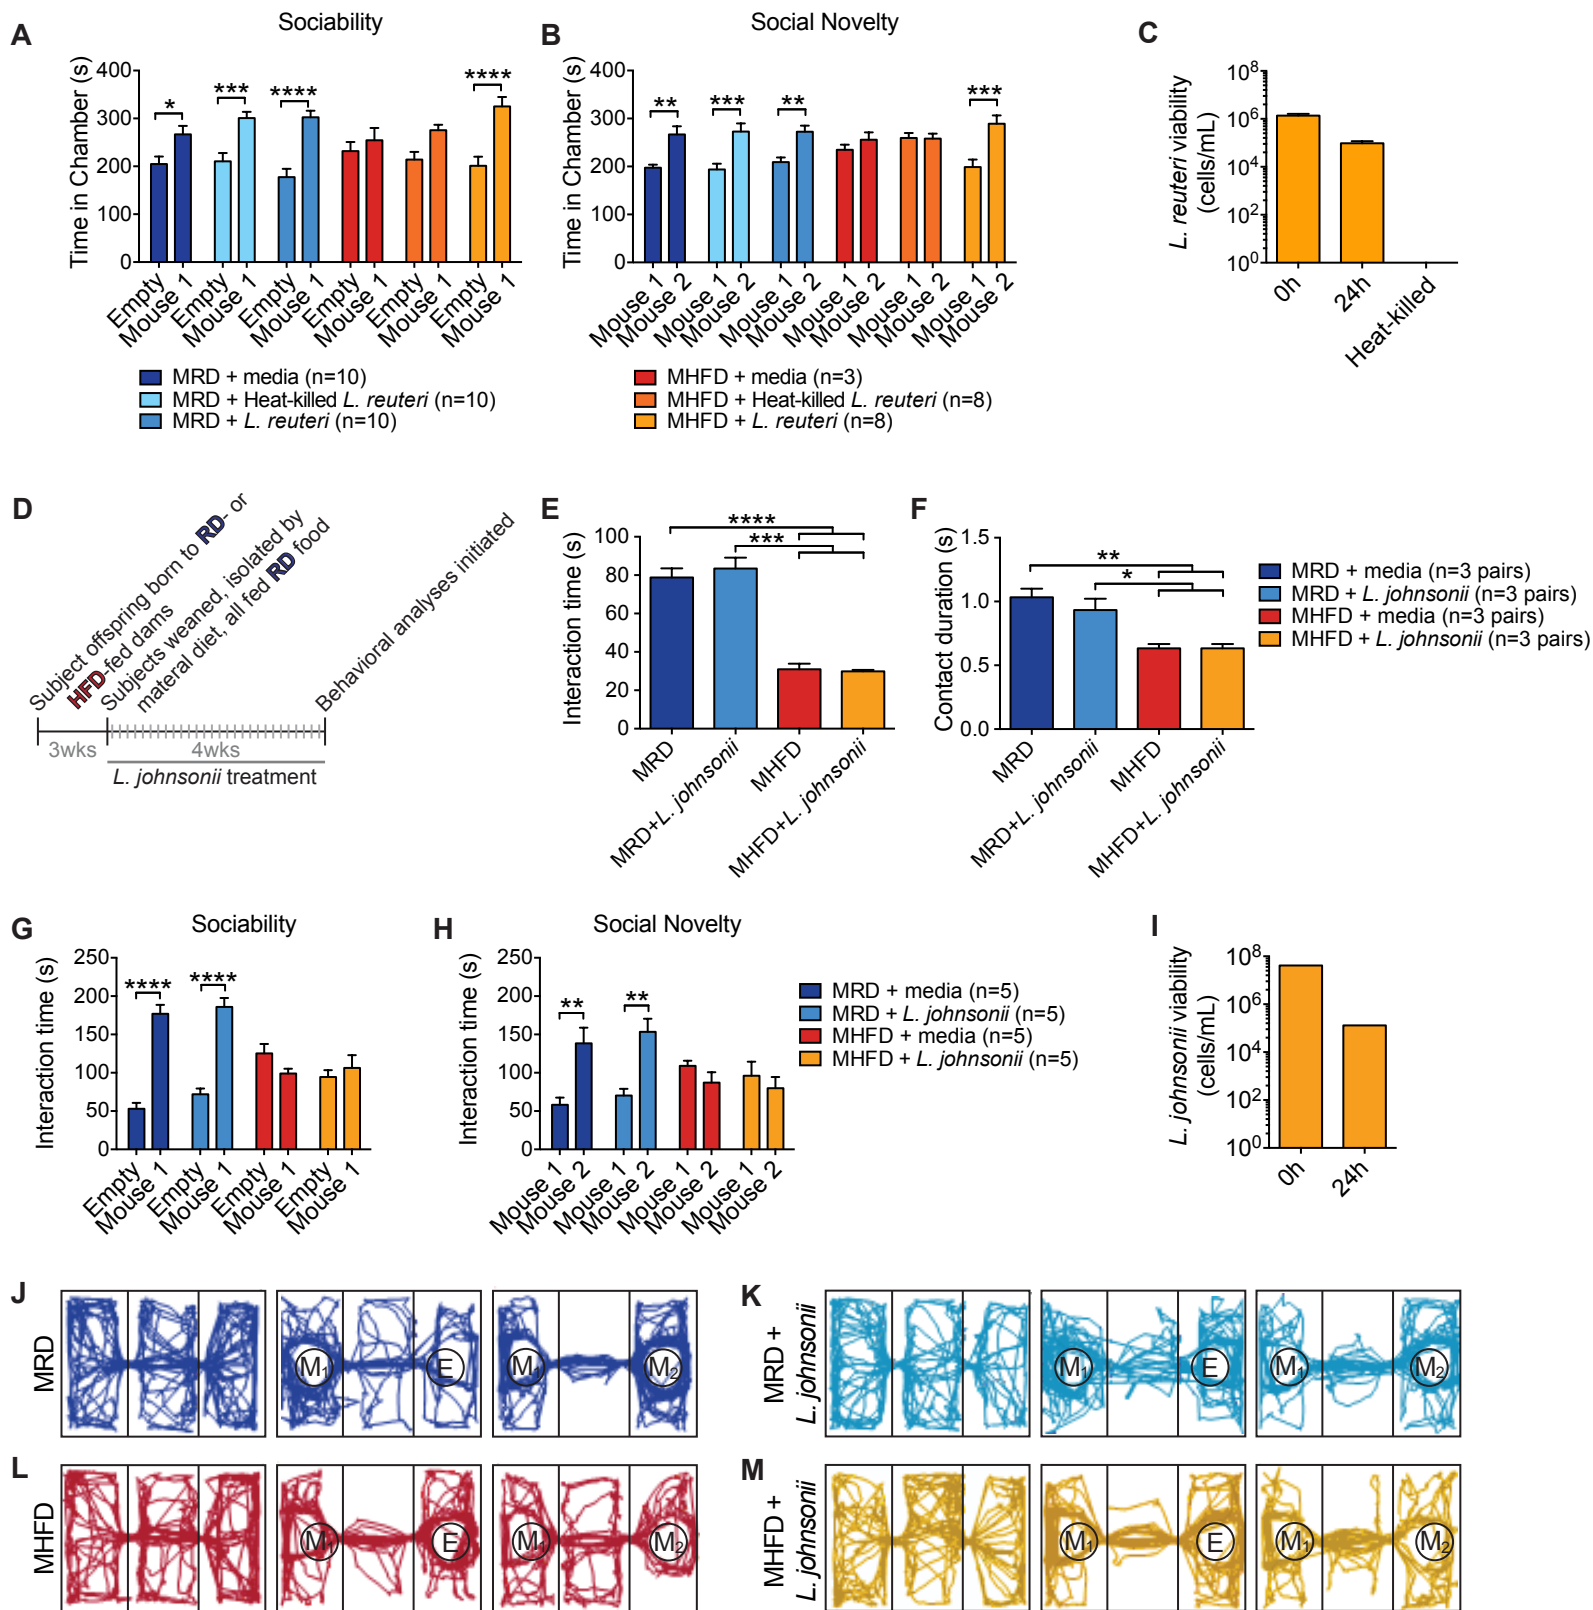

Figure S5, Buffington et al.

Supplement: NIHMS794301-supplement-5.pdf [file NIHMS794301-supplement-5.pdf]

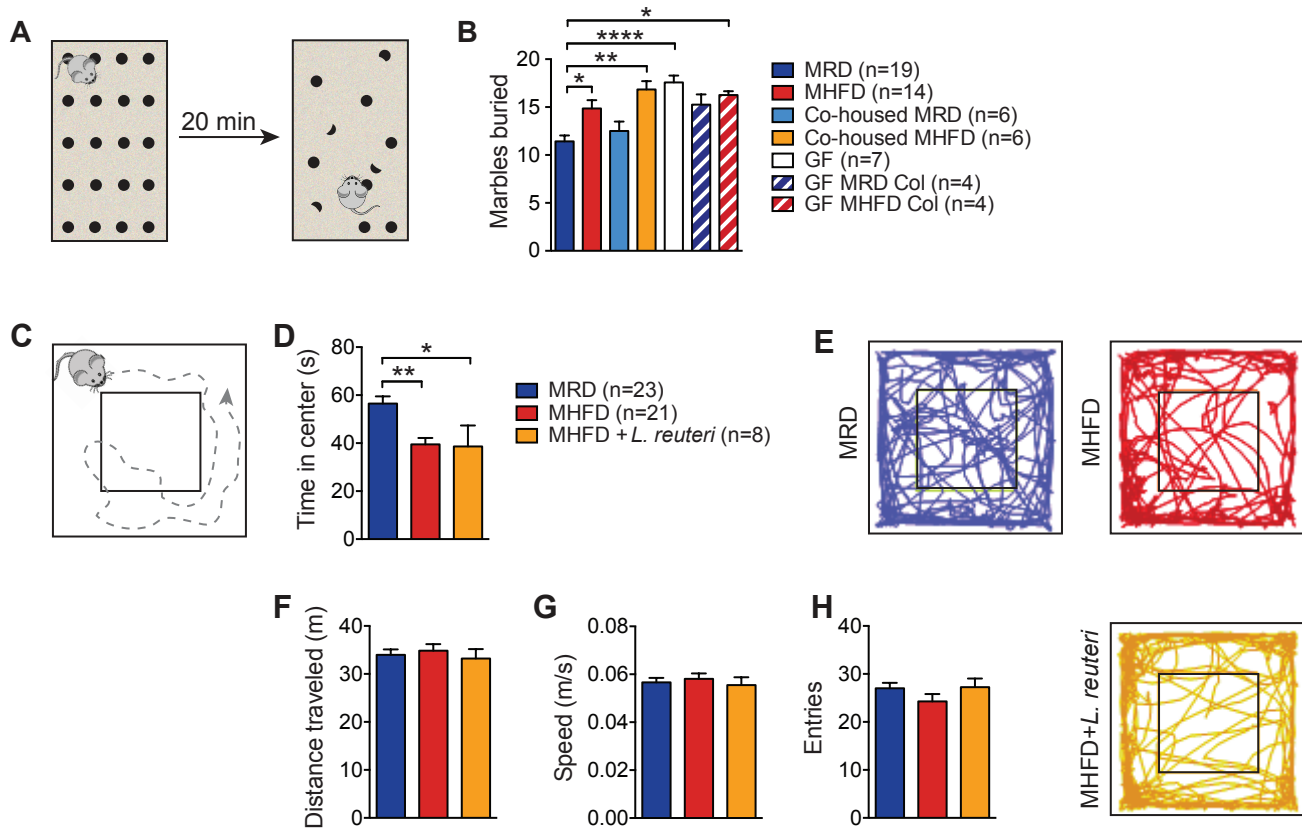

Figure S6, Buffington et al.

Supplement: NIHMS794301-supplement-6.pdf [file NIHMS794301-supplement-6.pdf]

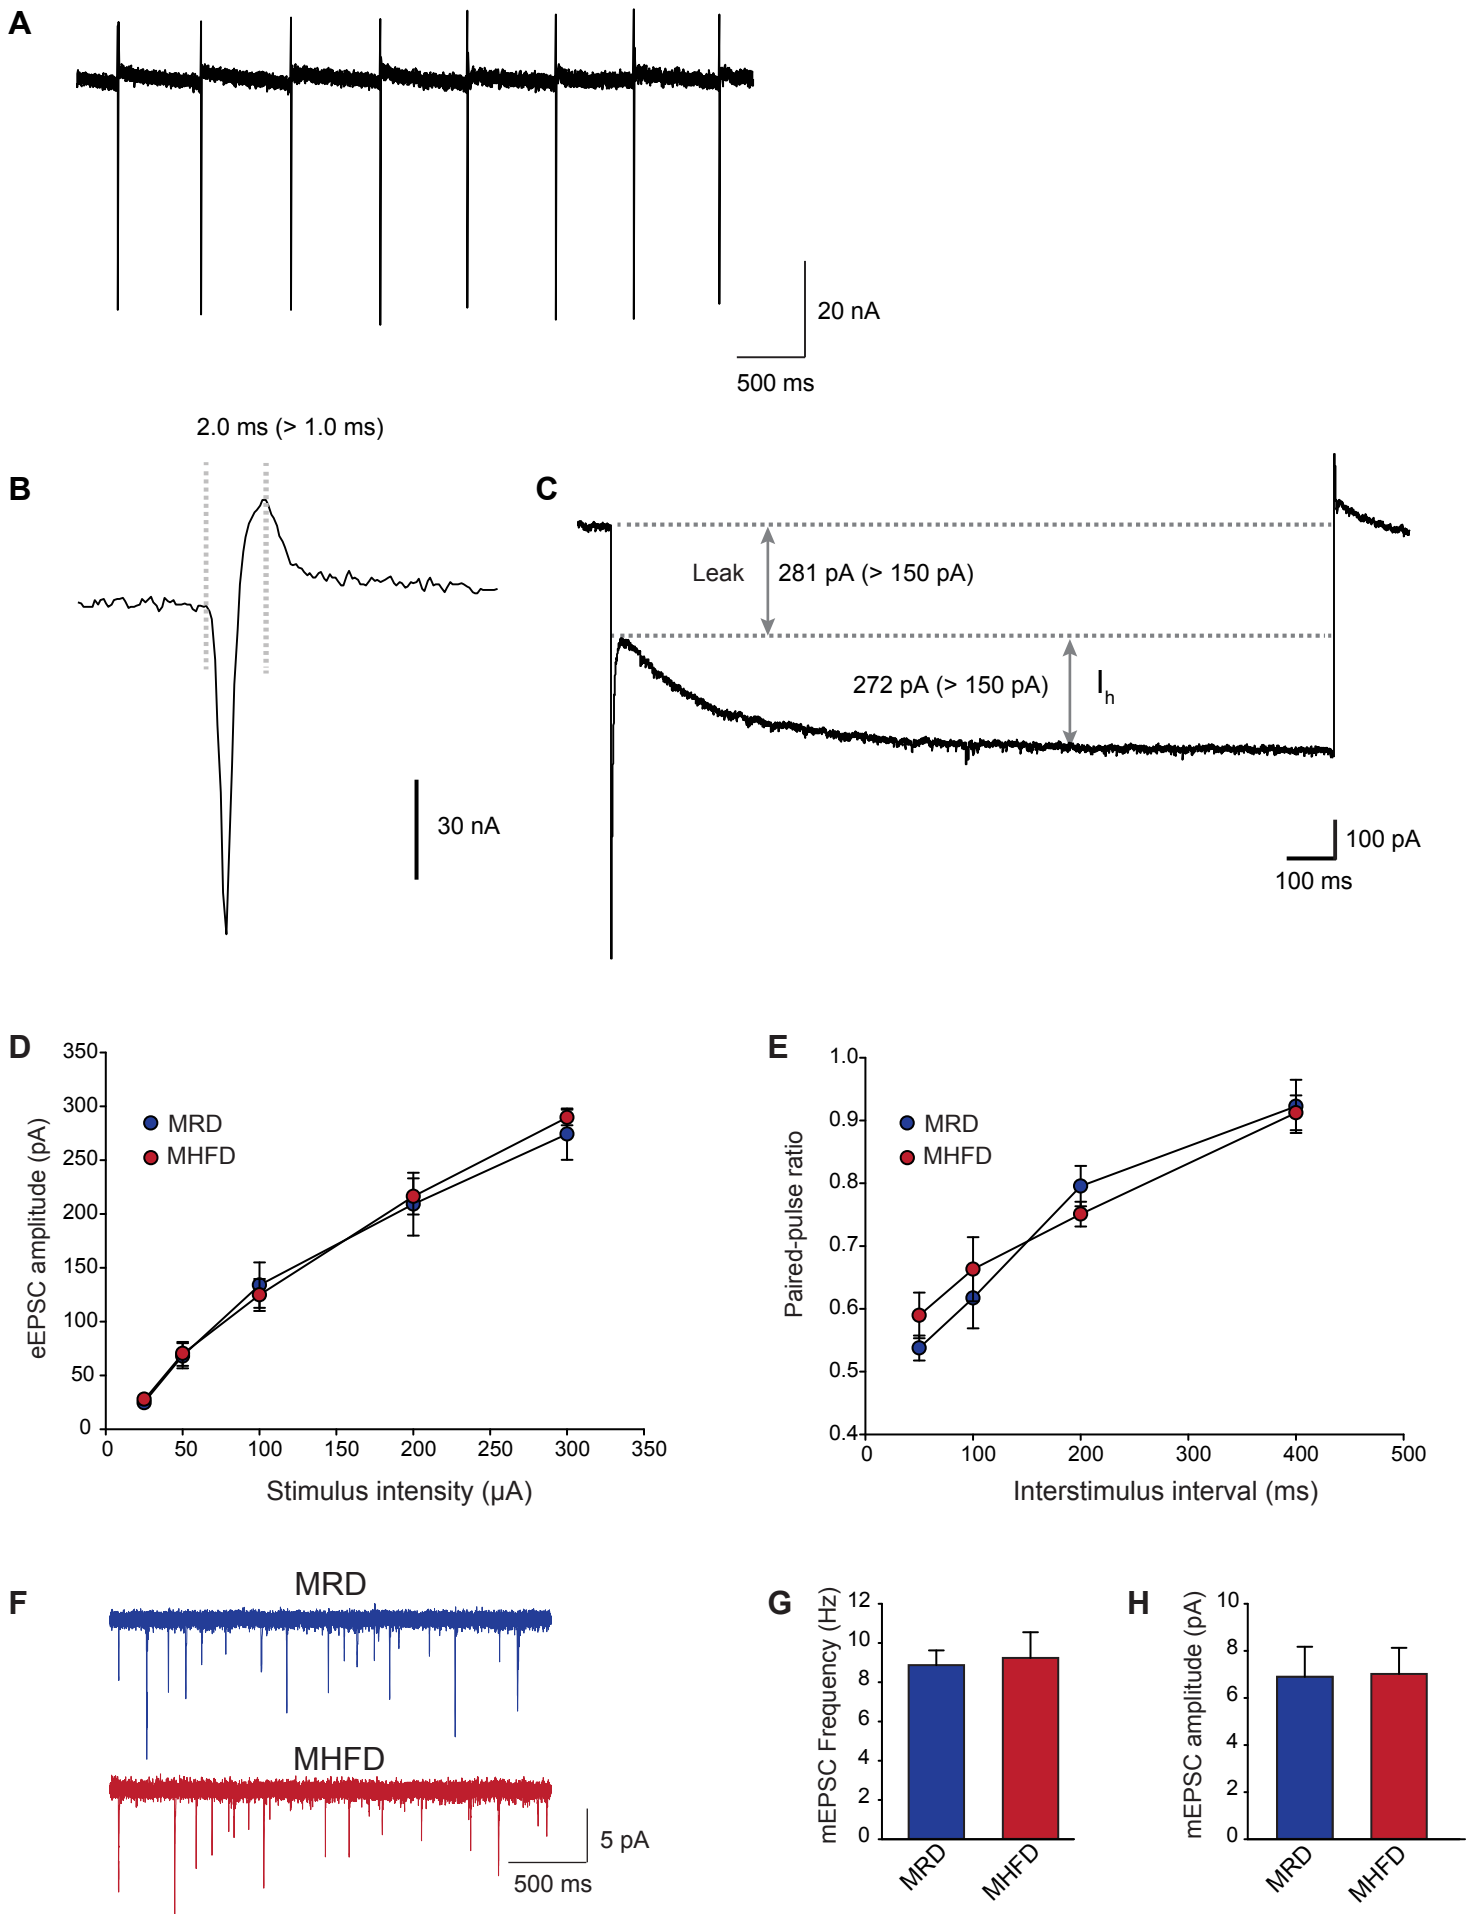

Figure S7, Buffington et al.

Supplement: NIHMS794301-supplement-7.pdf [file NIHMS794301-supplement-7.pdf]
